# Supplementary material for: Lack of robustness of hydrological models: A large-sample diagnosis and an attempt to identify the hydrological and climatic drivers
Source: Copernicus journal article supplement (doi:10.5194/hess-2024-80), 2024-05-21

### Supplementary material 3: Geographical repartition of the streamflow signatures used in the paper.

Each of the twenty maps shows the repartition of a given streamflow variable (in the title of the map).  $Q_{\text{mean}}$ : Annual mean flow,  $Q[0.01-99]$ : Flow percentiles,  $Q[\text{hf-lf}]_{\text{freq}}$ : Frequency of [high-low]flow events,  $Q[\text{hf-lf}]_{\text{dur}}$ : Duration of high-low flow events, BFI: Baseflow index, SFDC: Slope of the flow duration curve,  $Q[\text{C-L-H}]V$ : [Total-Low-High]flow variability, QAC: Flow one day autocorrelation, RR: Runoff ratio.

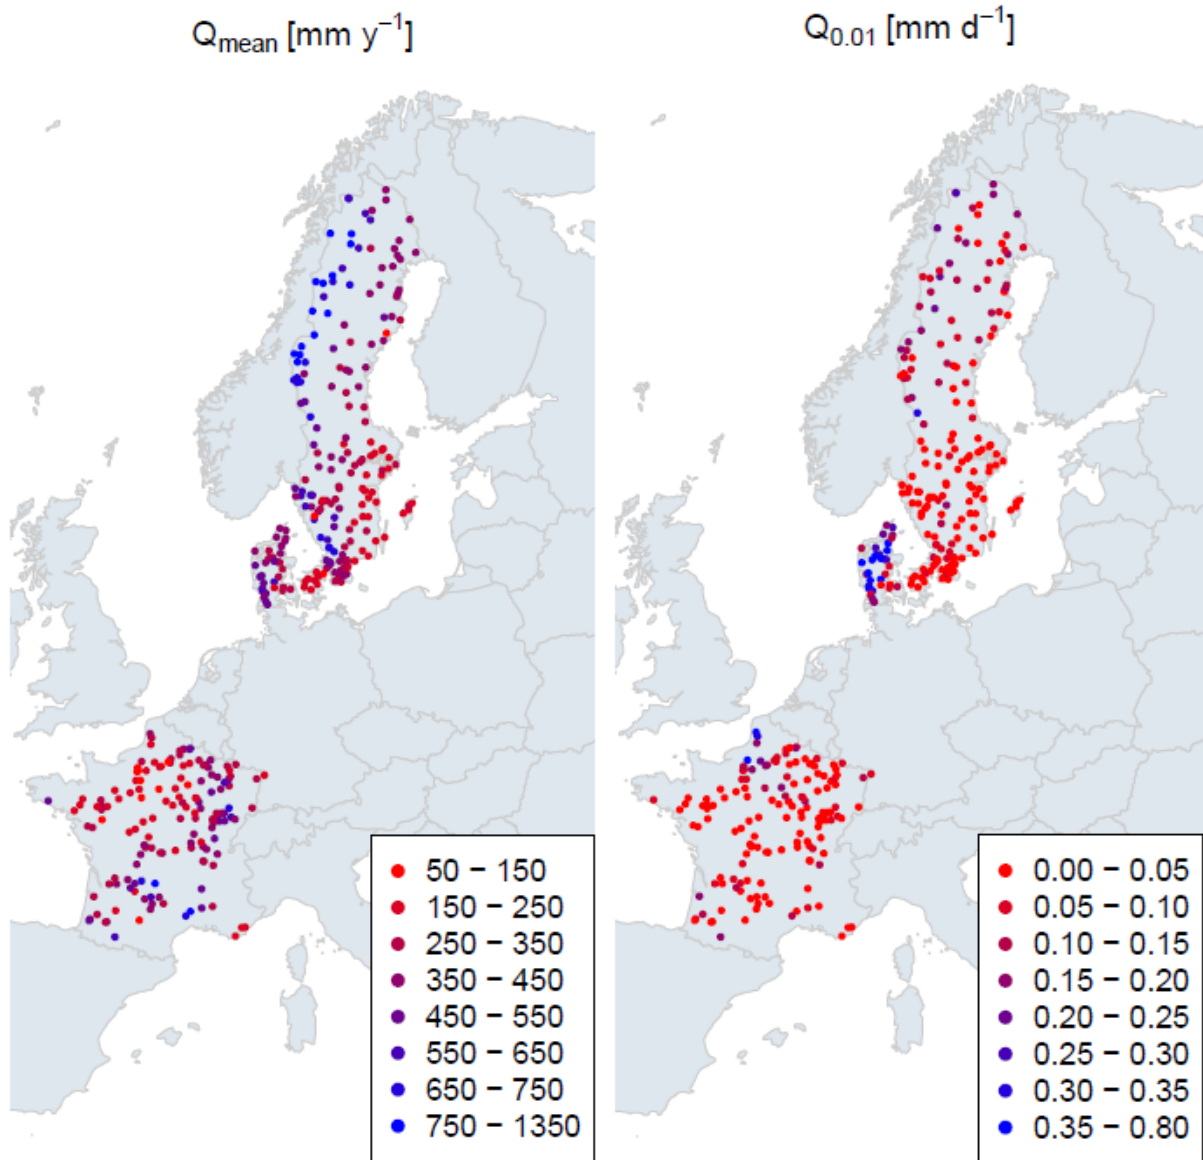

$Q_{0.1}$  [mm d<sup>-1</sup>]

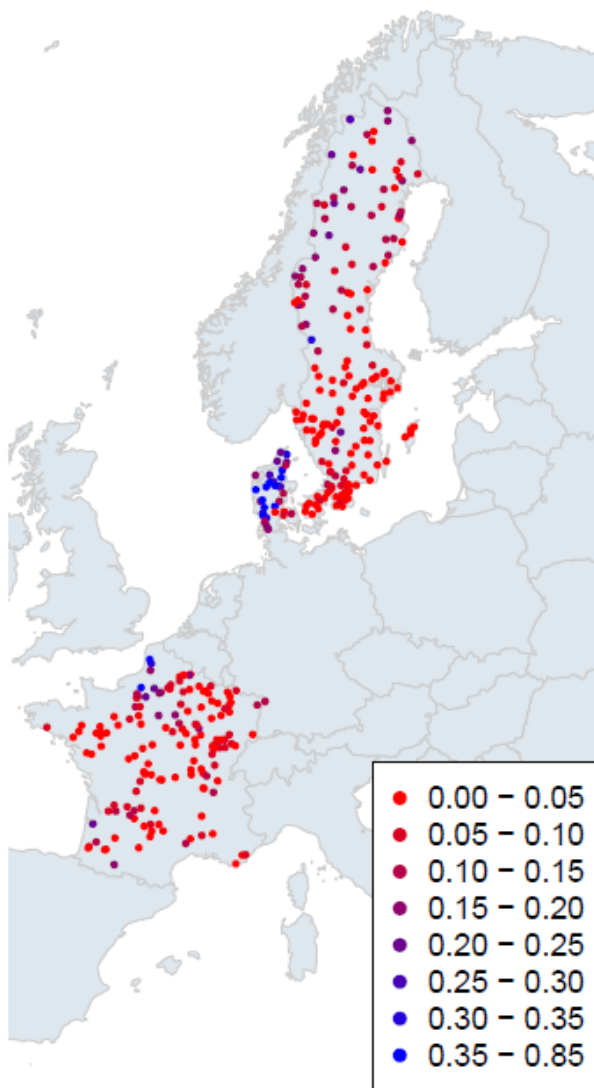

$Q_1$  [mm d<sup>-1</sup>]

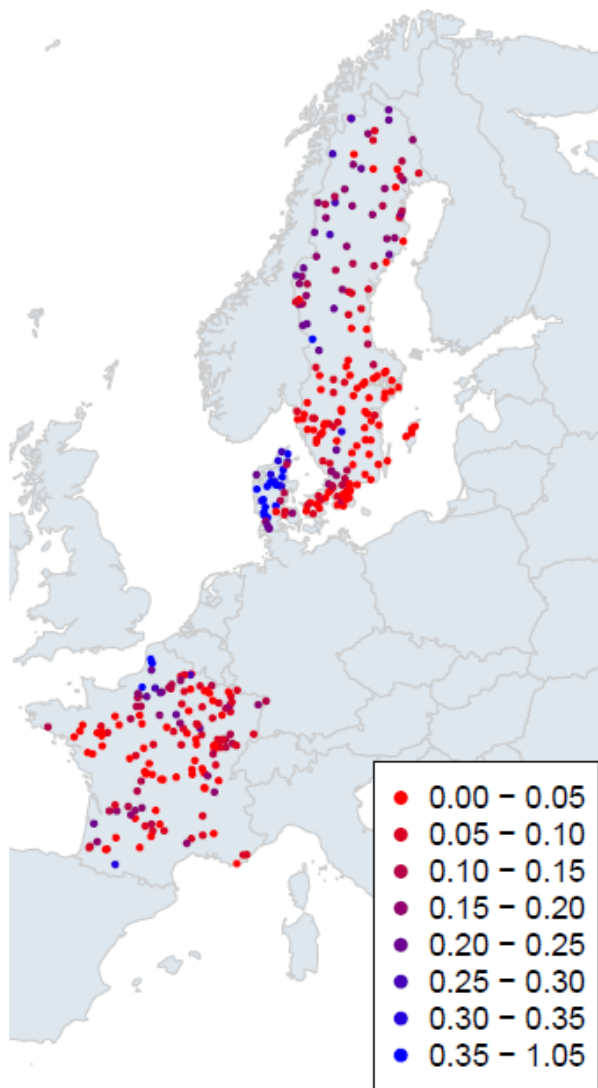

$Q_5$  [mm d<sup>-1</sup>]

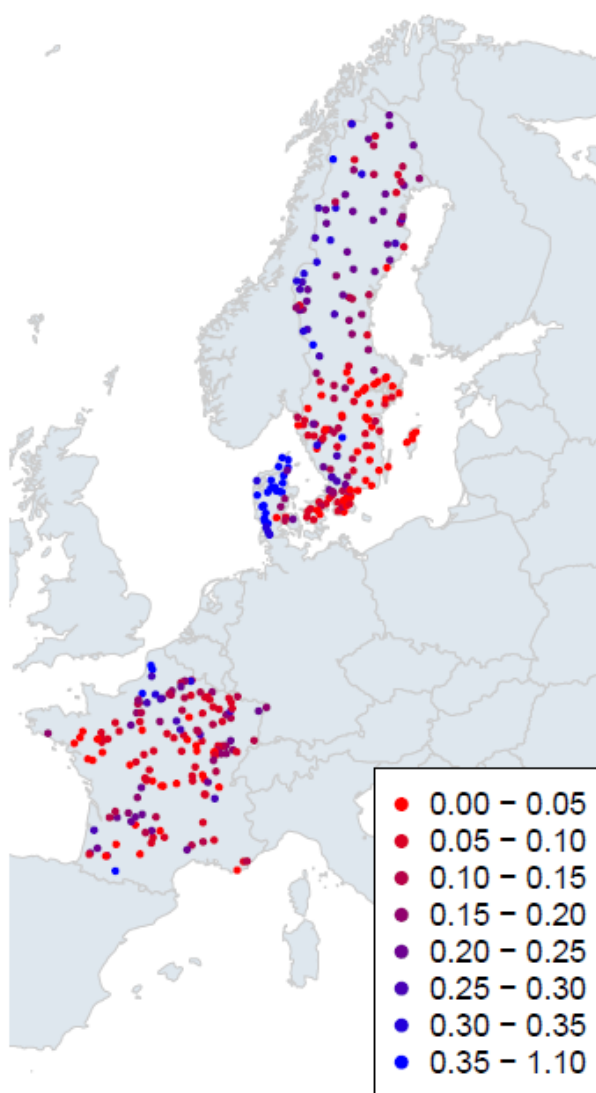

$Q_{50}$  [mm d<sup>-1</sup>]

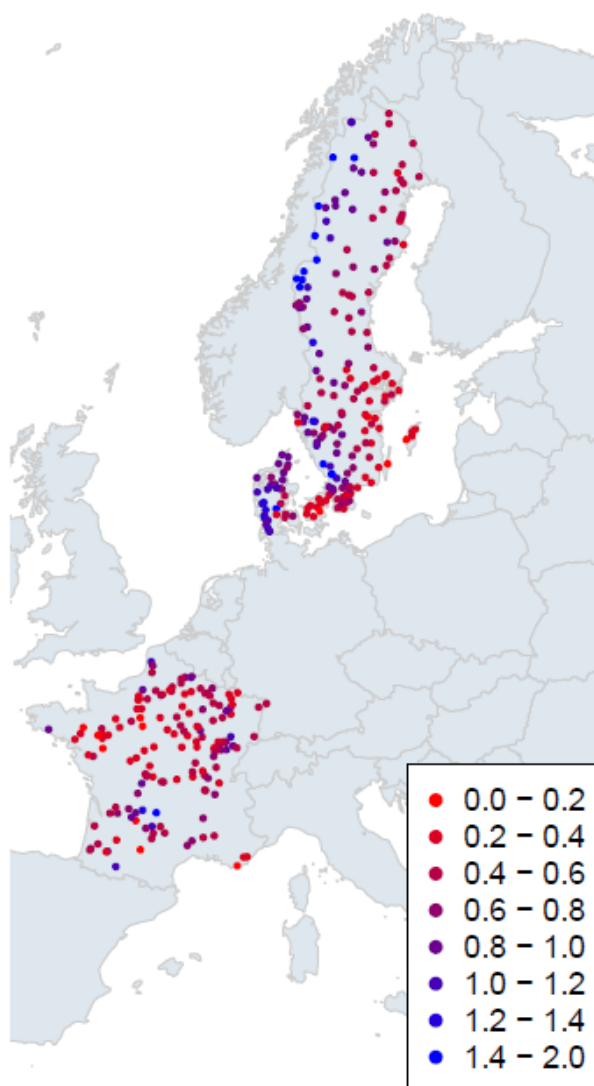

$Q_{85}$  [mm d<sup>-1</sup>]

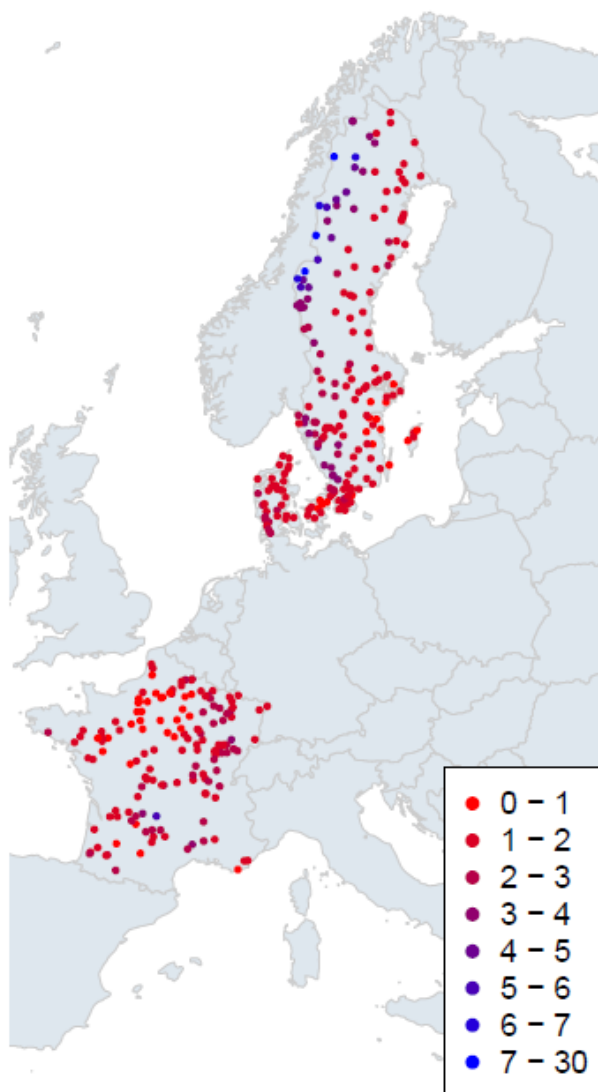

$Q_{95}$  [mm d<sup>-1</sup>]

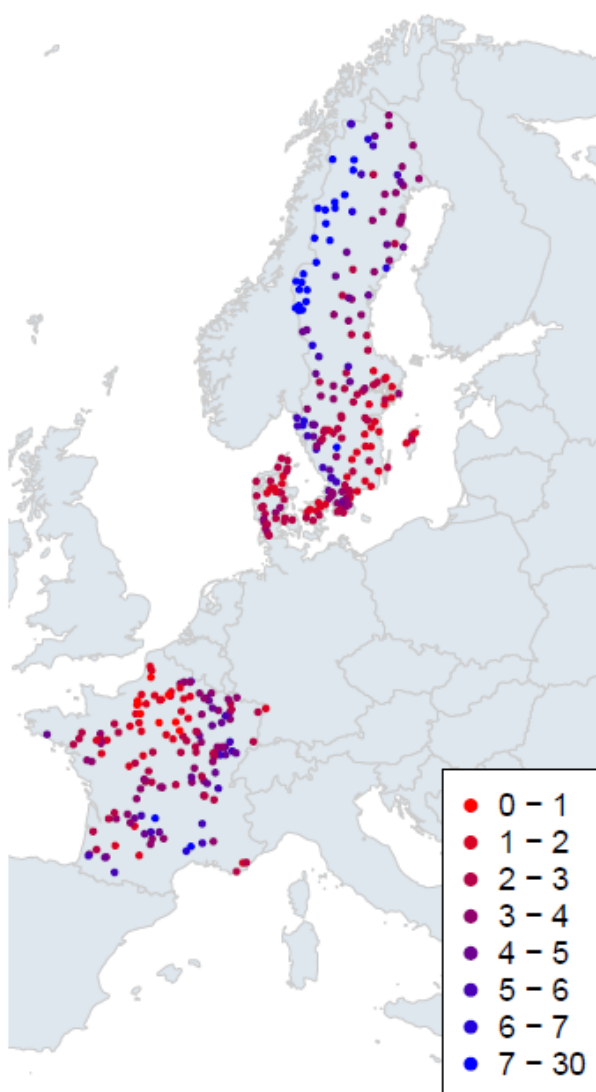

$Q_{99}$  [ $\text{mm d}^{-1}$ ]

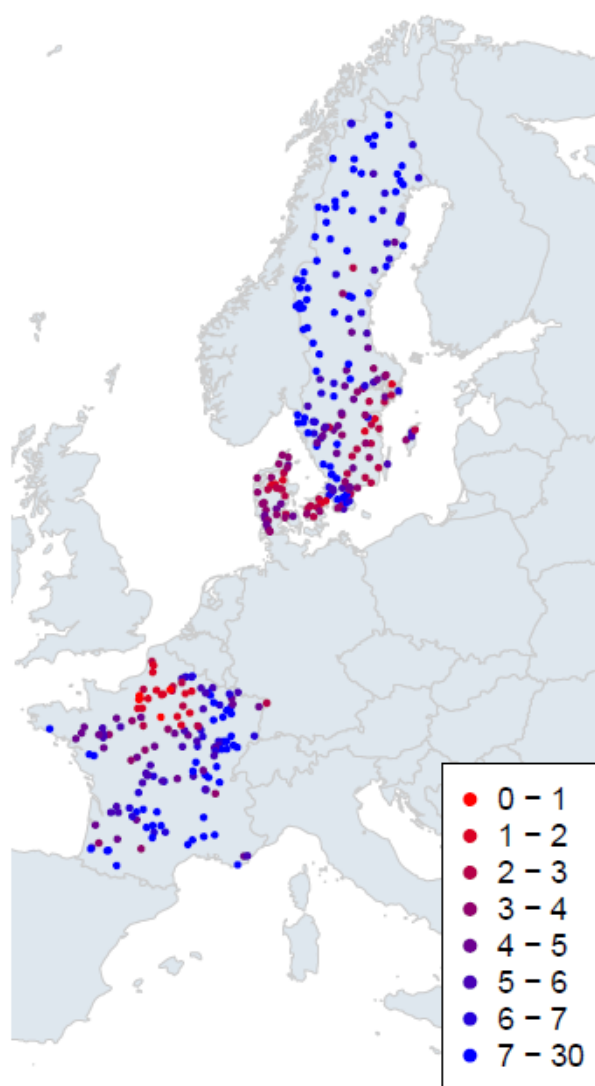

$Q_{\text{hffreq}}$  [ $\text{d y}^{-1}$ ]

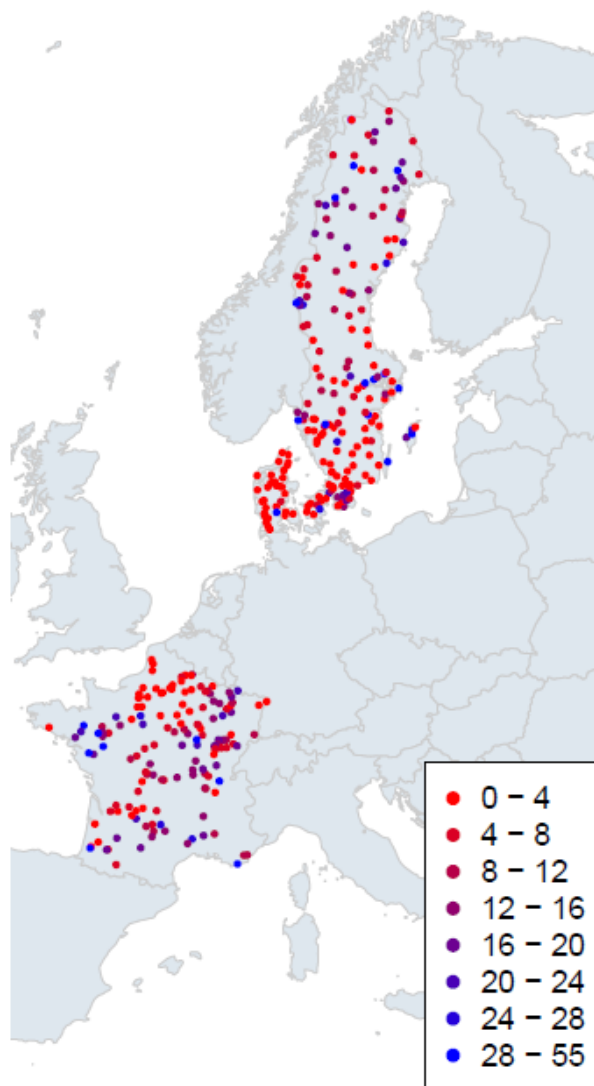

$Q_{\text{hfdur}}$  [d]

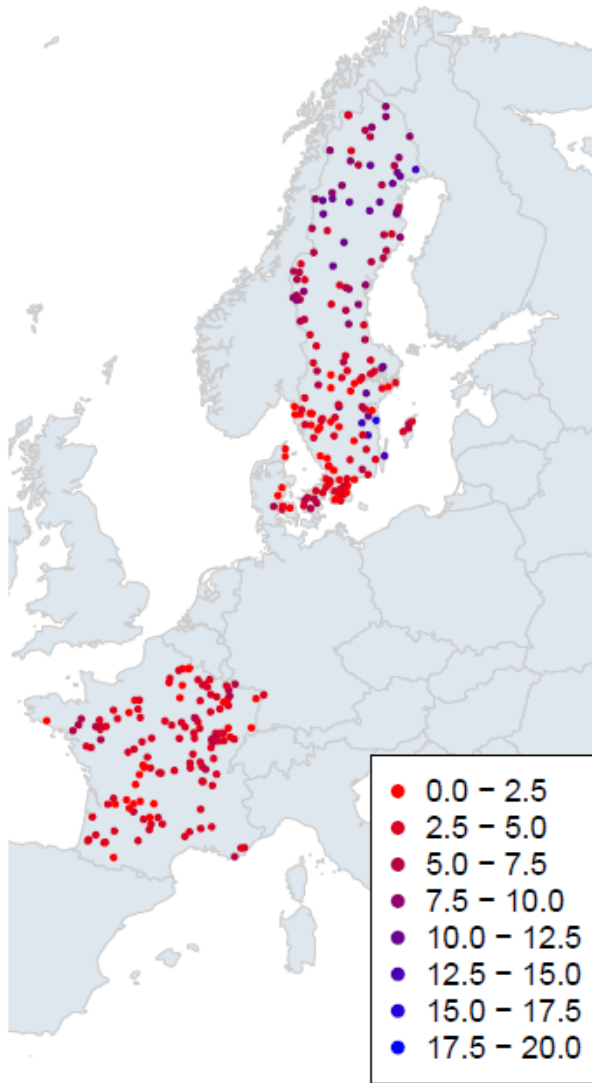

$Q_{\text{ffreq}}$  [ $\text{d y}^{-1}$ ]

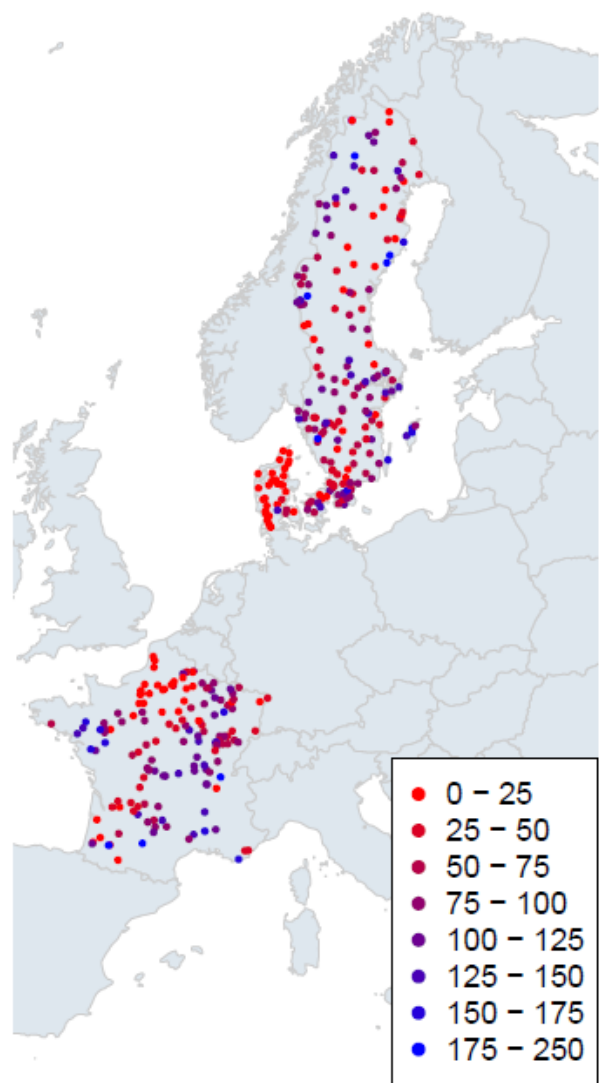

$Q_{\text{ifdur}}$  [d]

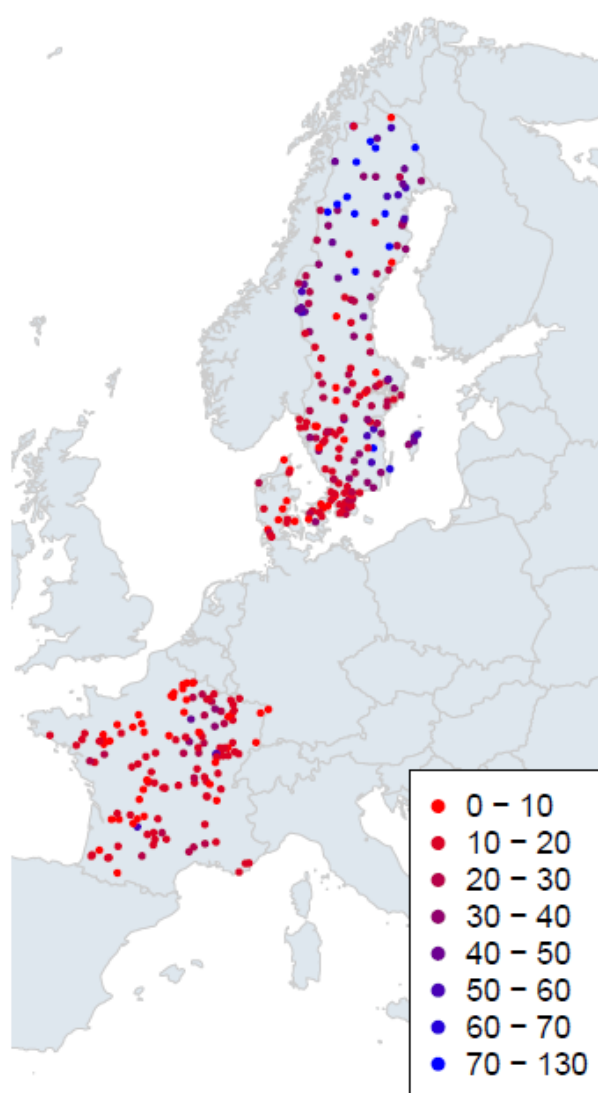

$I_{\text{BF}}$  [-]

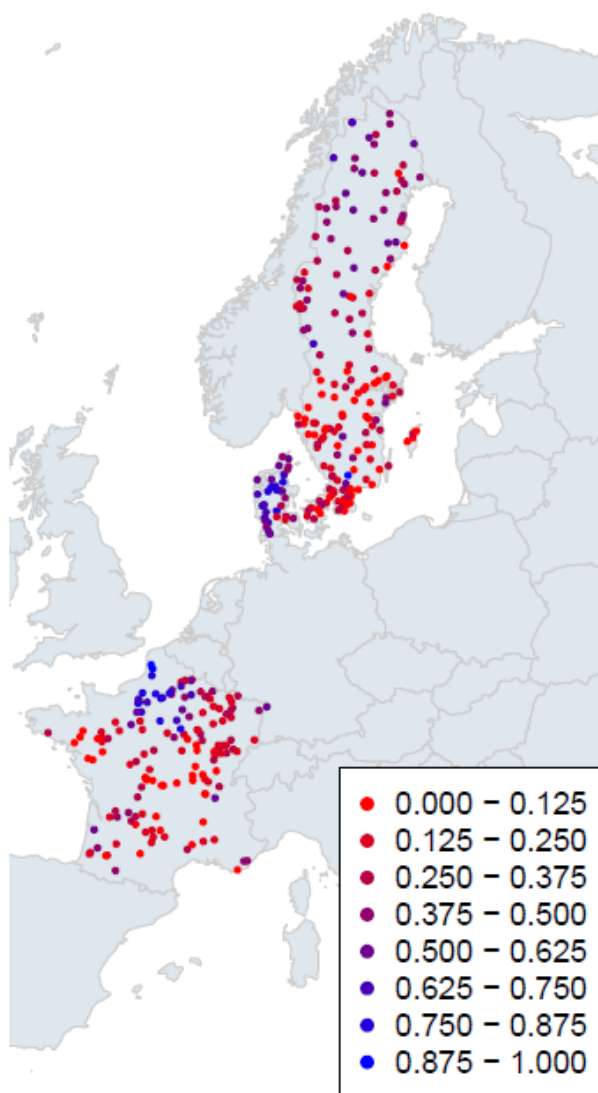



$S_{FDC}$  [-]

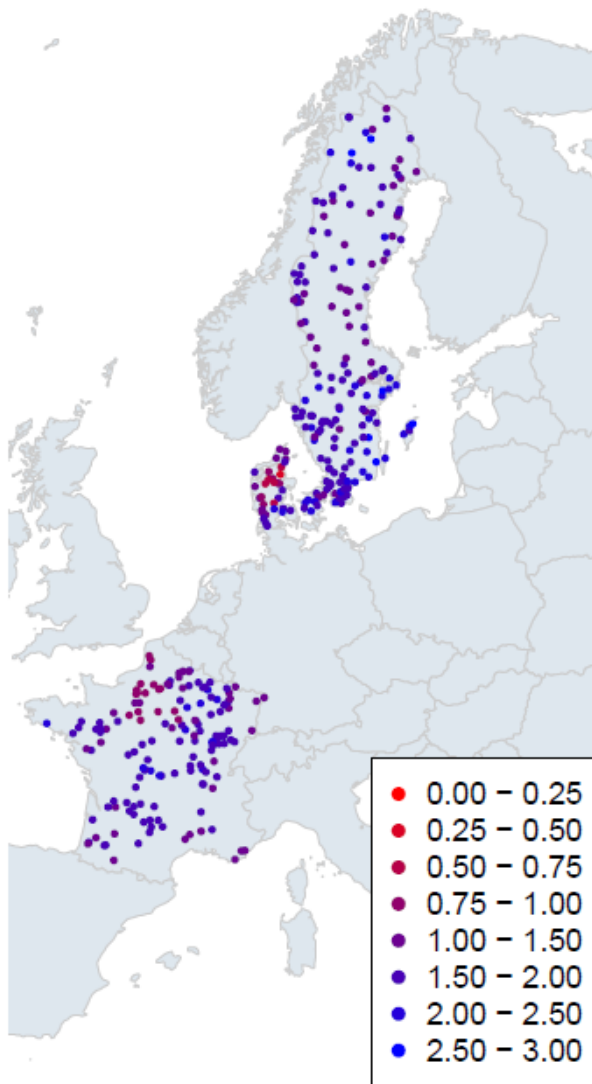

$Q_{CV}$  [-]

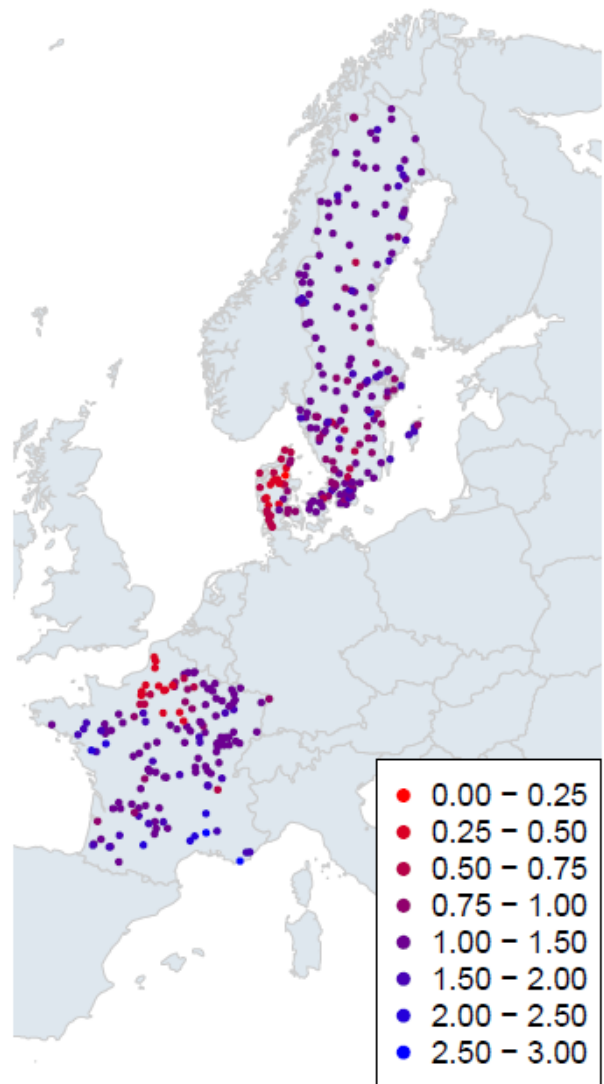



$Q_{LV} [-]$

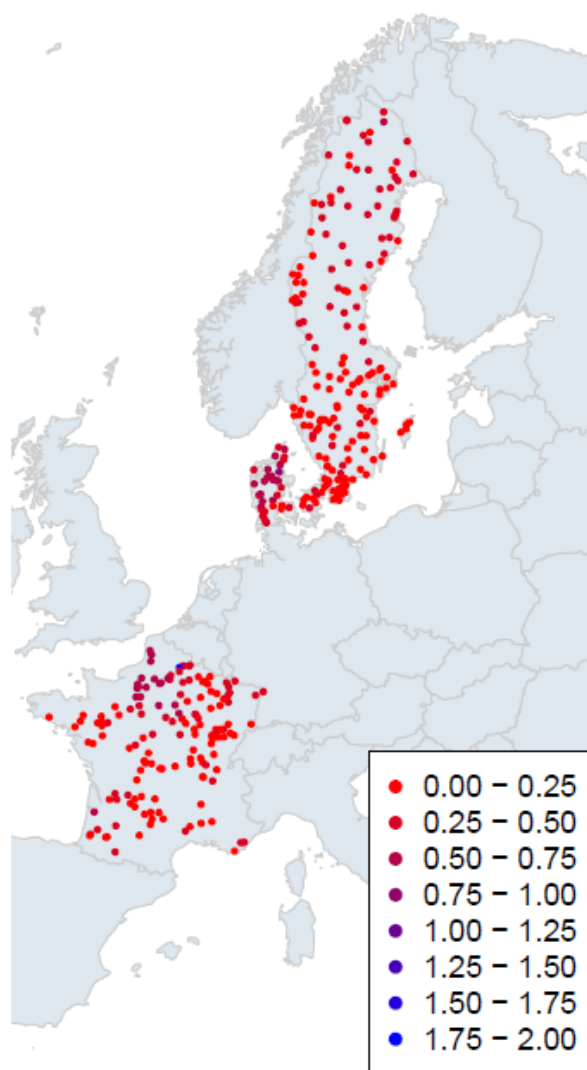

$Q_{HV} [-]$

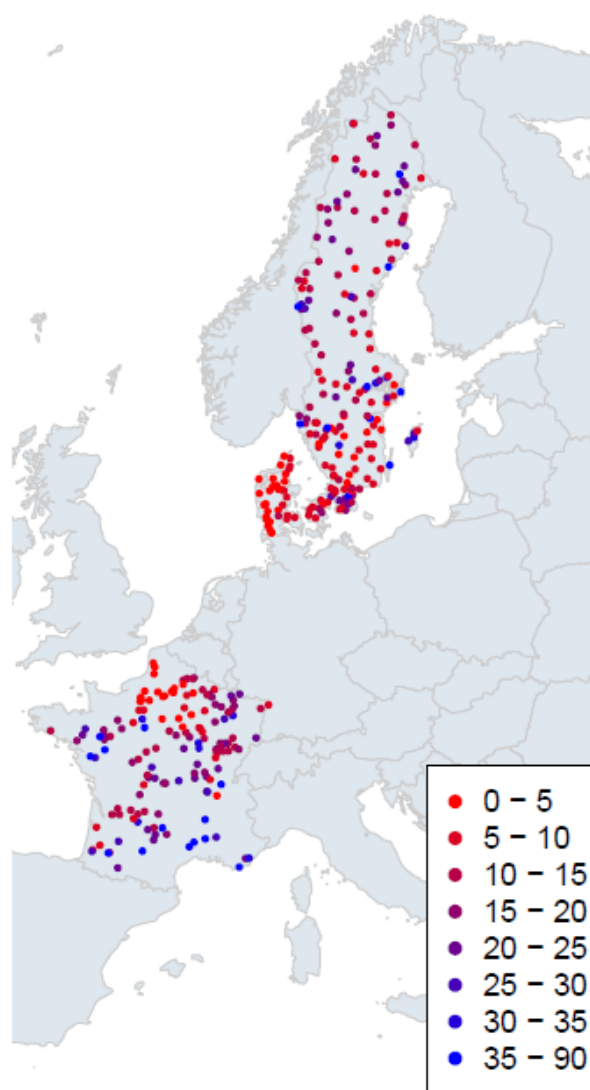

$Q_{AC} [-]$

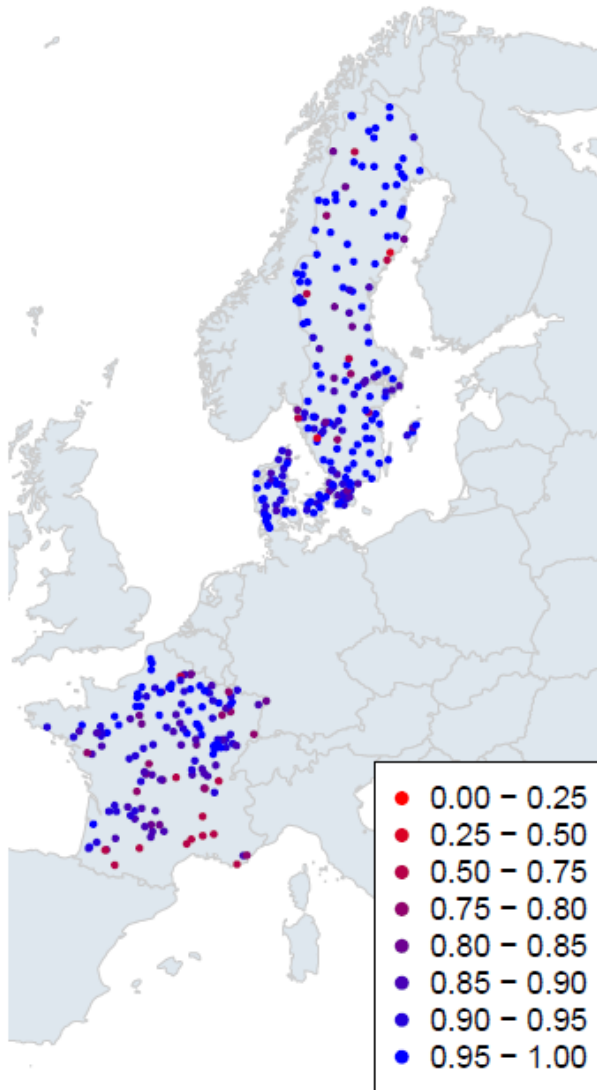

$R_R [-]$

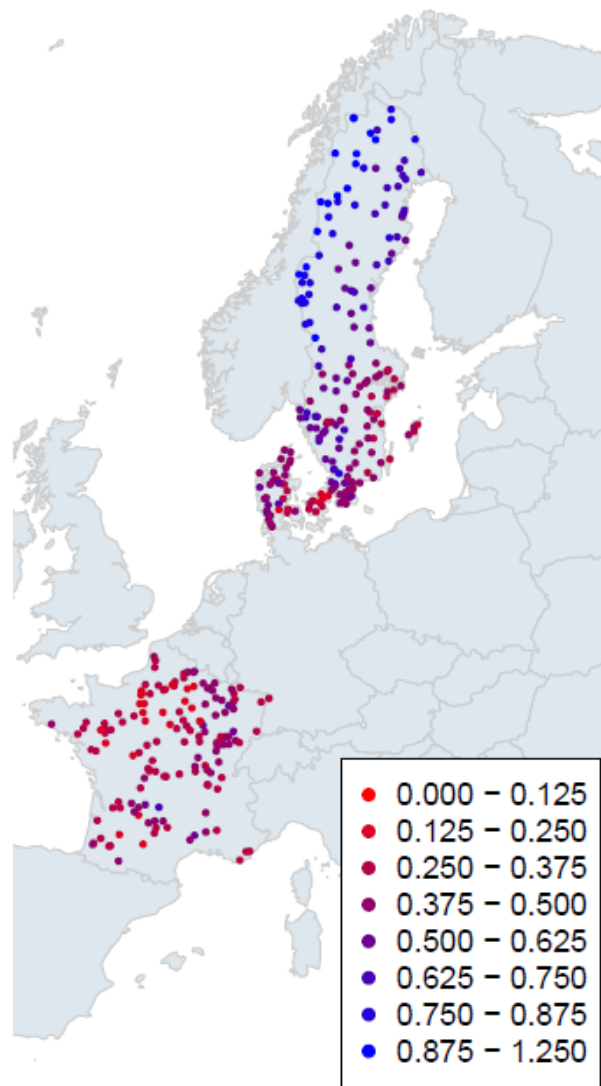

Supplement: Supplementary file 3 [file hess-2024-80-supplement.zip]
