# Supplementary material for: Lack of robustness of hydrological models: A large-sample diagnosis and an attempt to identify the hydrological and climatic drivers
Source: Copernicus journal article supplement (doi:10.5194/hess-2024-80), 2024-05-21

## Supplementary material 4: Distributions by country of the streamflow signatures in the catchment set used in the paper.

Each of the twenty plots shows the distributions of a given streamflow variable.  $Q_{mean}$ : Annual mean flow,  $Q[0.01-99]$ : Flow percentiles,  $Q[hf-lf]freq$ : Frequency of [high-low]flow events,  $Q[hf-lf]dur$ : Duration of high-low flow events, BFI: Baseflow index, SFDC: Slope of the flow duration curve,  $Q[C-L-H]V$ : [Total-Low-High]flow variability, QAC: Flow one day autocorrelation, RR: Runoff ratio.

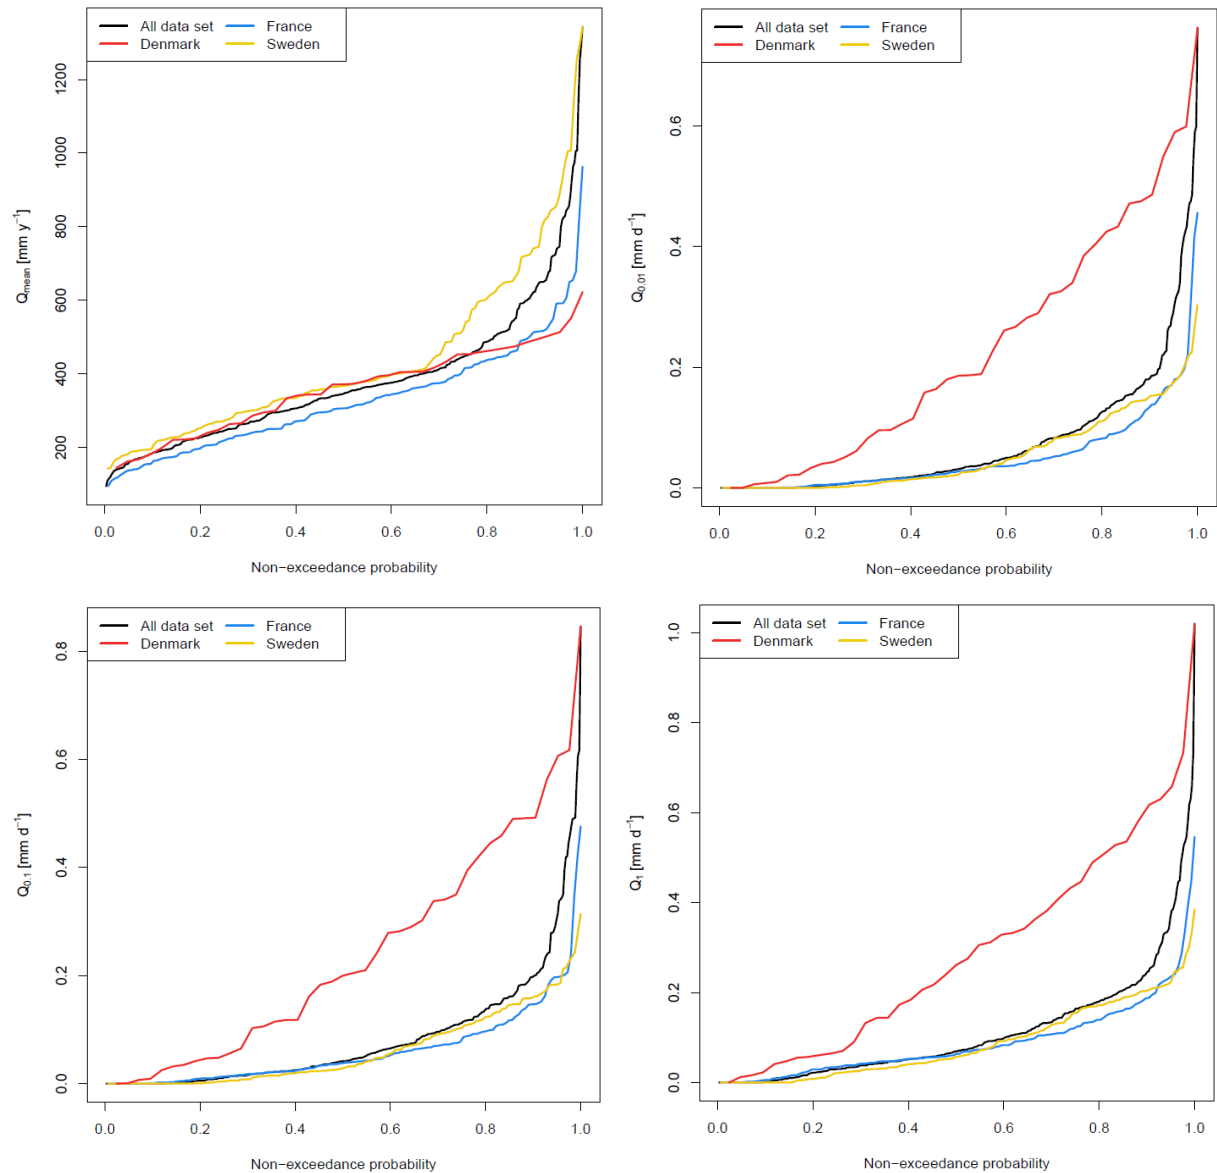

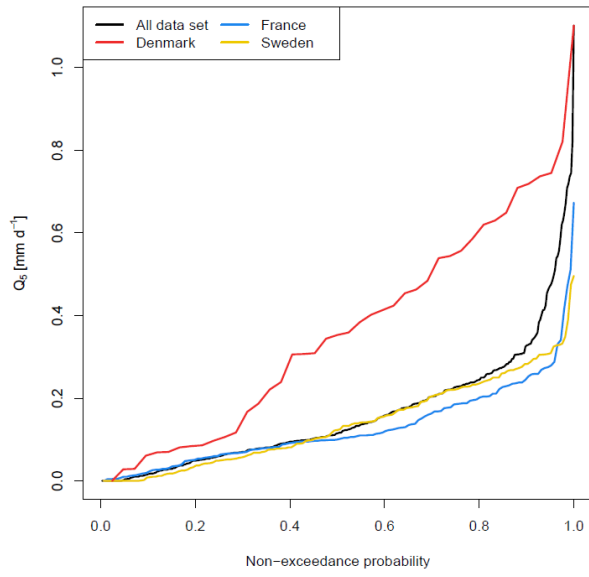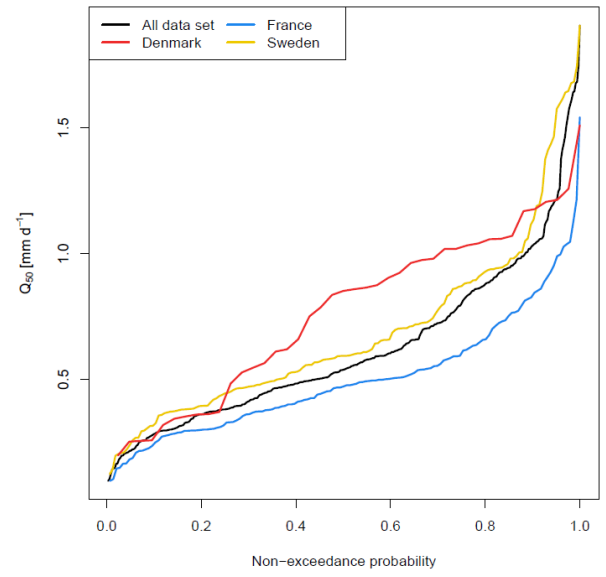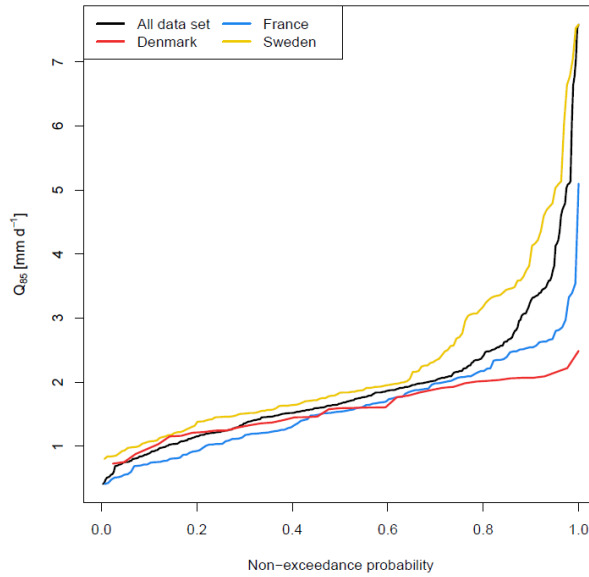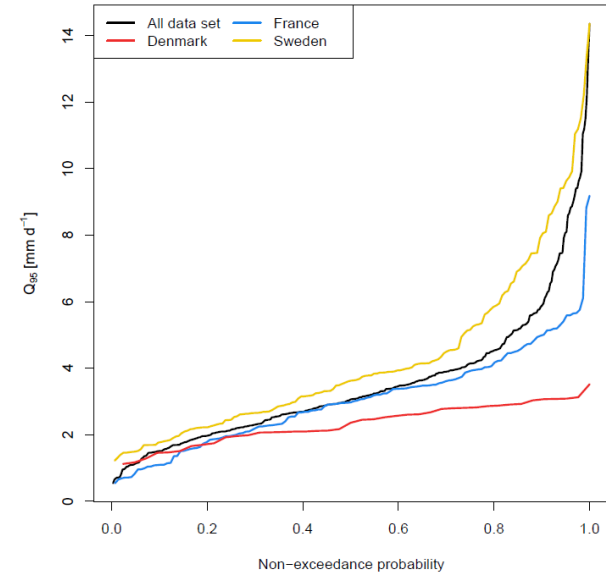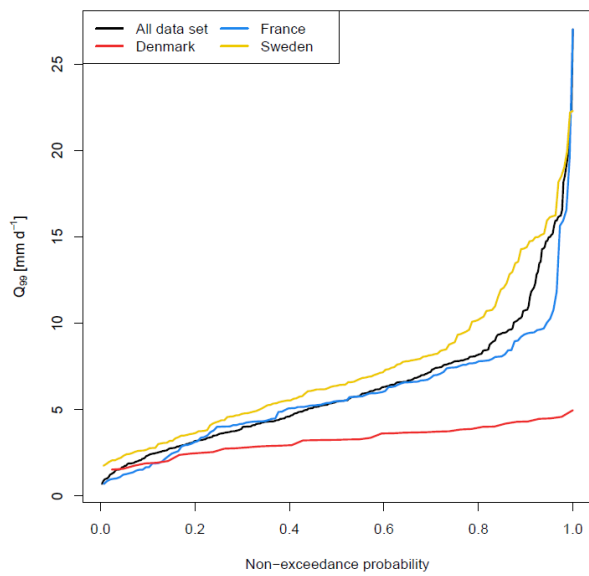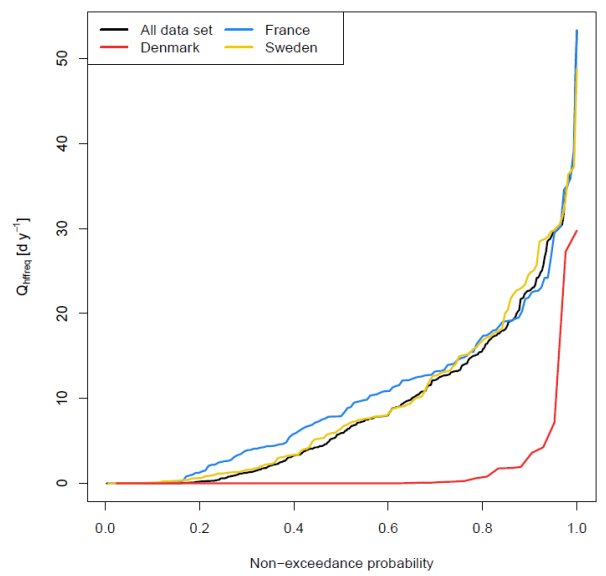

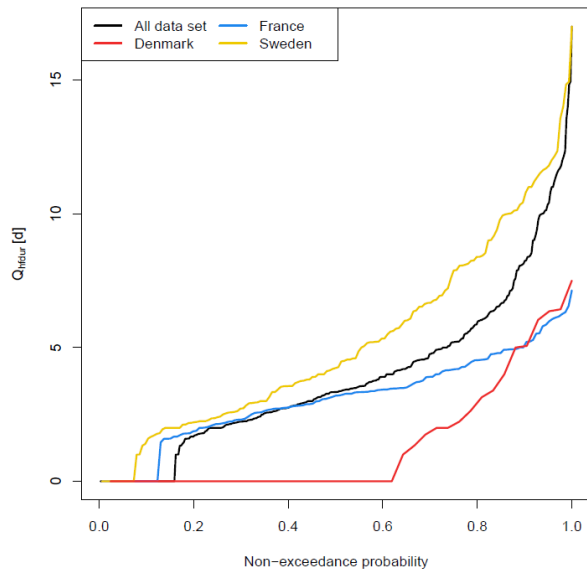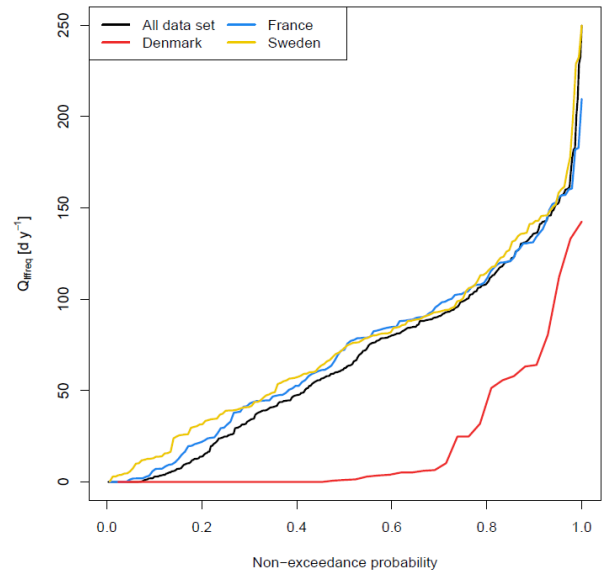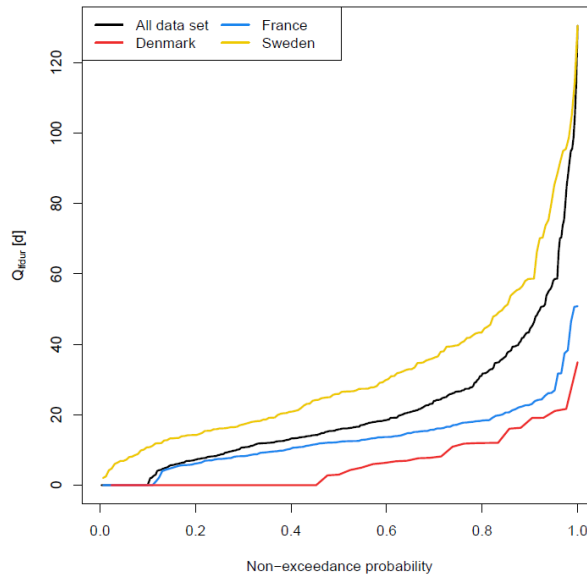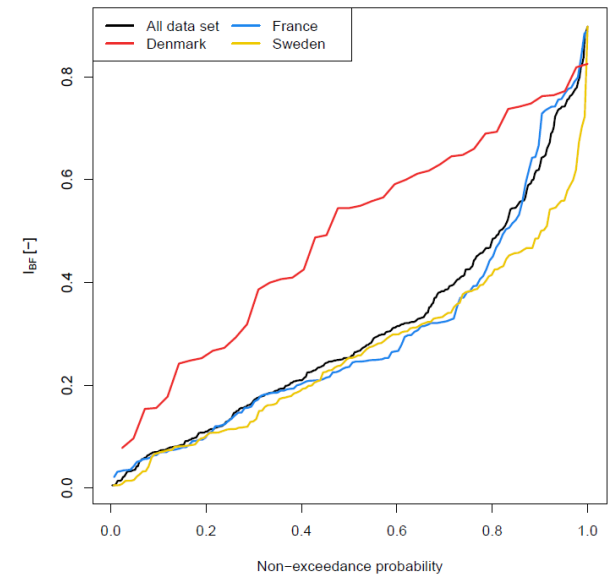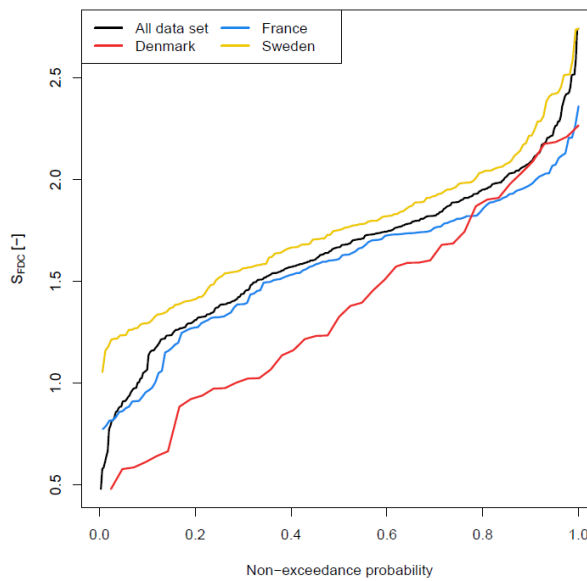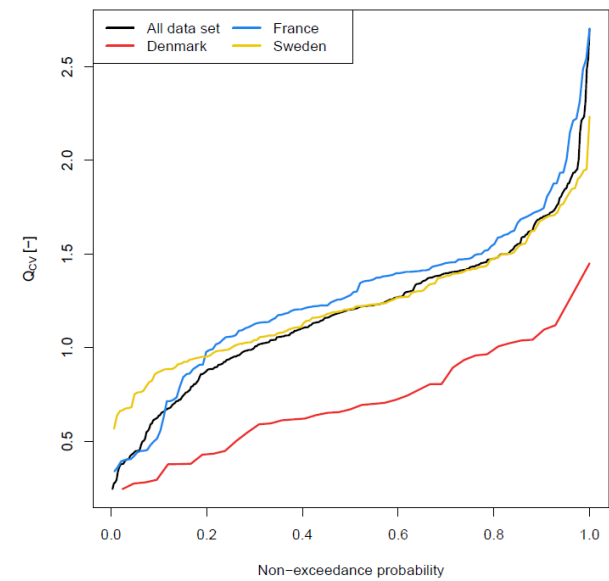

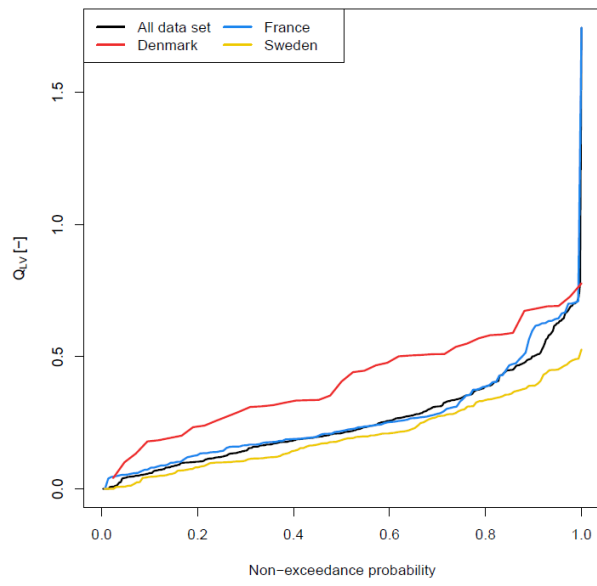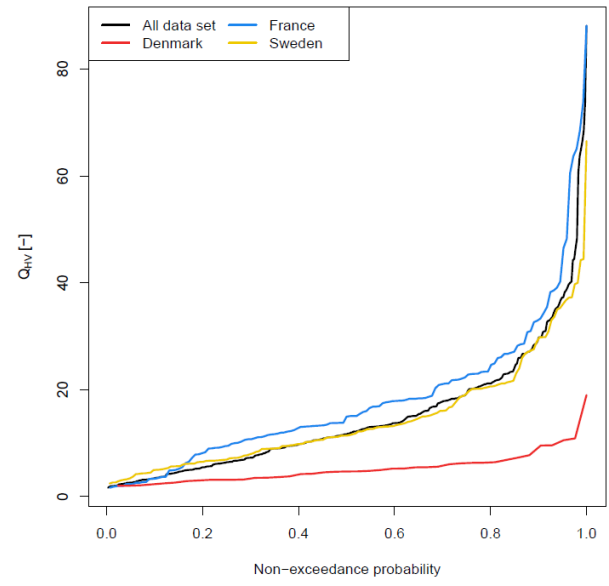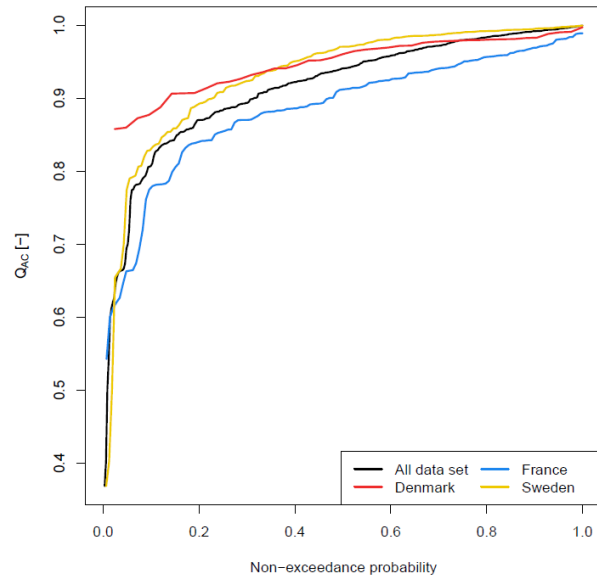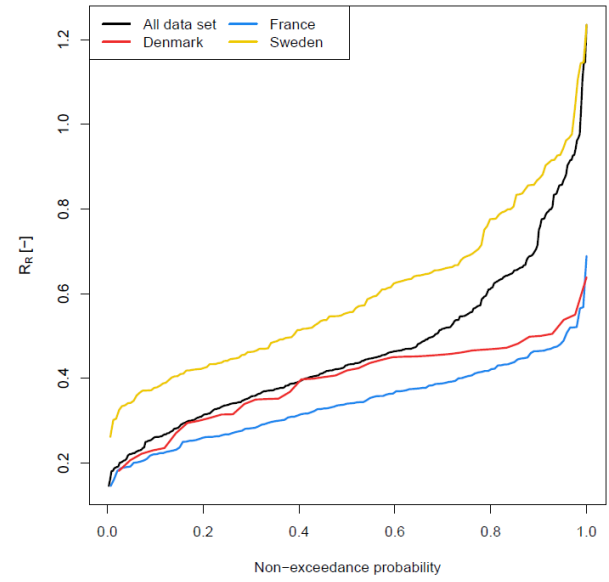

Supplement: Supplementary file 4 [file hess-2024-80-supplement.zip]
