# Supplementary material for: Lack of robustness of hydrological models: A large-sample diagnosis and an attempt to identify the hydrological and climatic drivers
Source: Copernicus journal article supplement (doi:10.5194/hess-2024-80), 2024-05-21

## Supplementary material 2: Distributions by country of the climatic signatures in the catchment set used in the paper.

Each of the eight plots shows the distributions of a given climatic variable. PMA: Mean annual precipitation, EMA: Mean annual evaporation, HUM: Humidity Index, PCV: Precipitation variability, Pint: Precipitation intensity index, DWoP: Days without precipitation ratio, Seaso: Seasonality index, SnFrac: Snow Fraction.

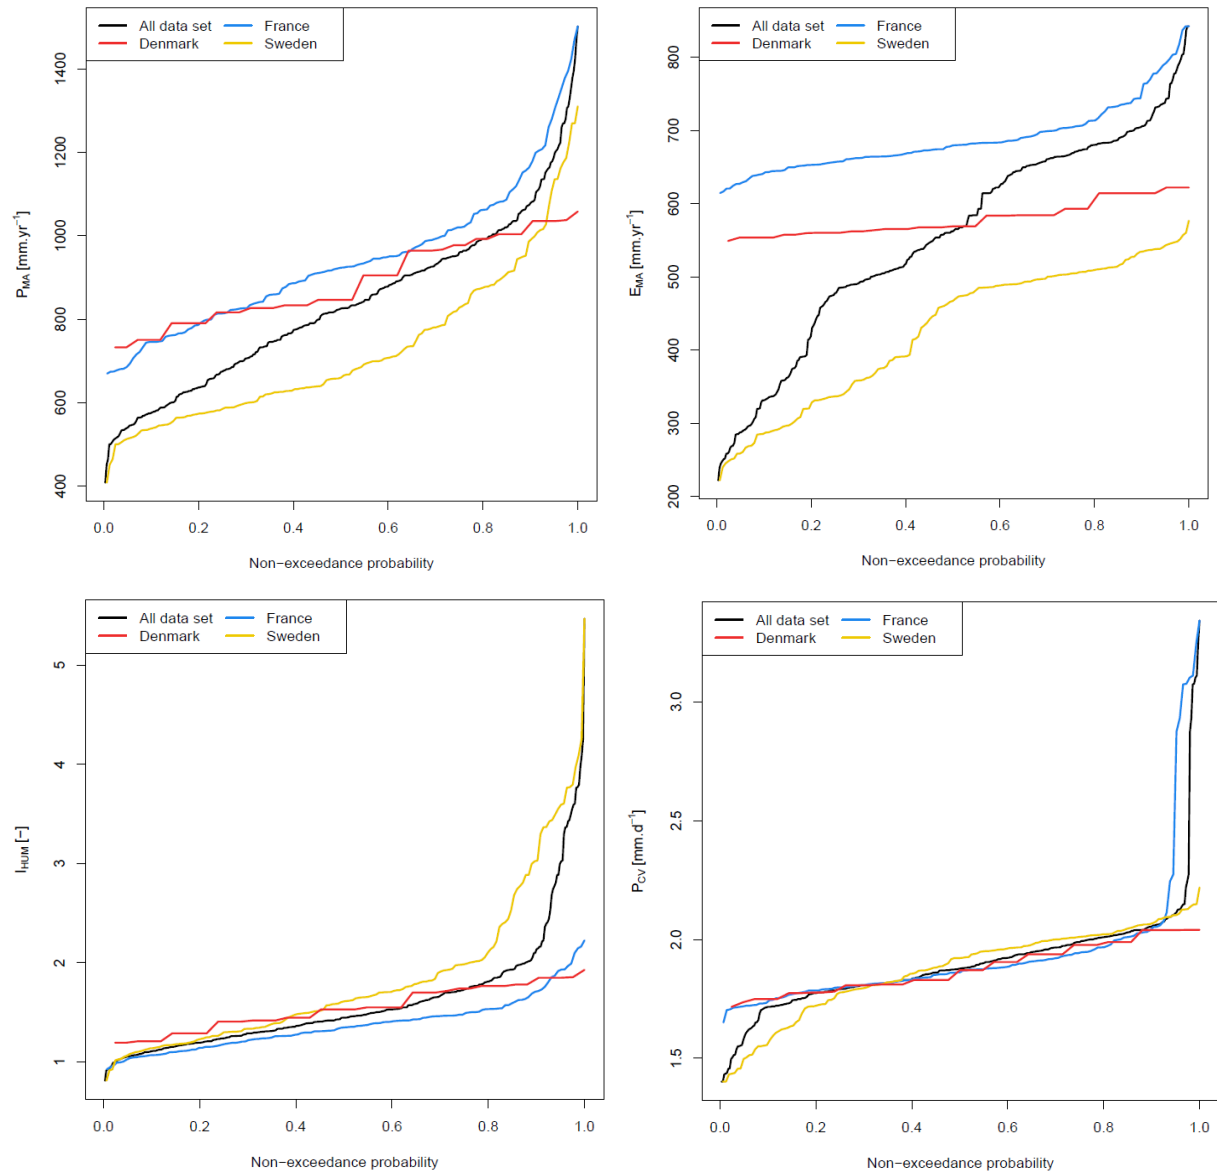

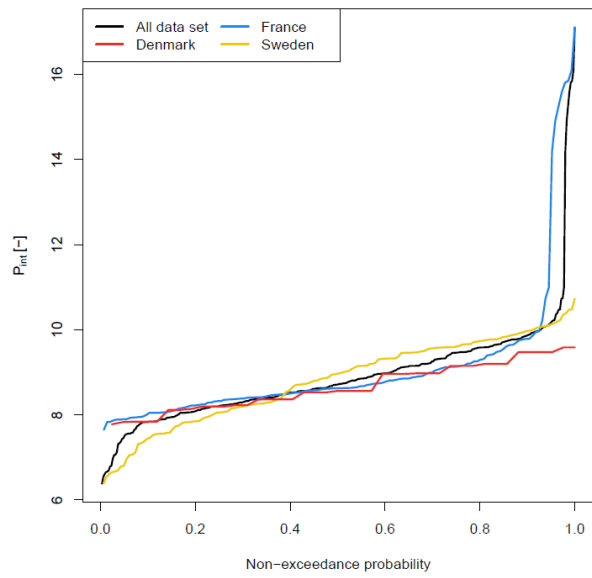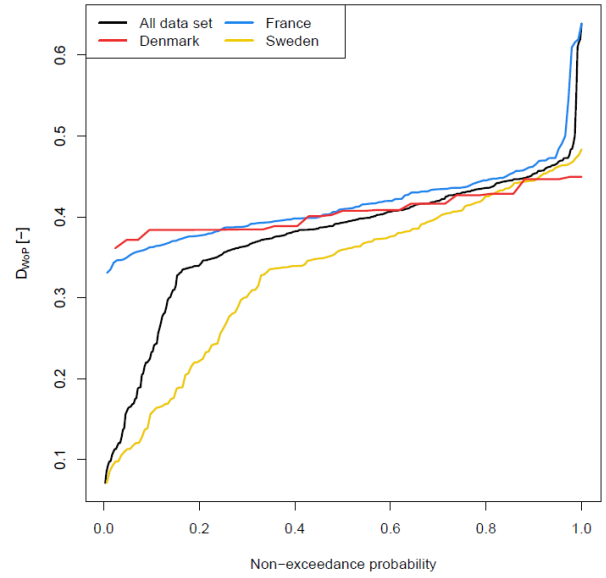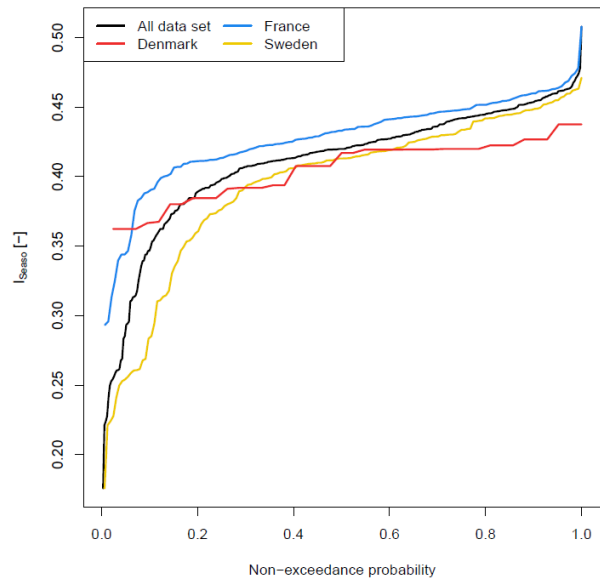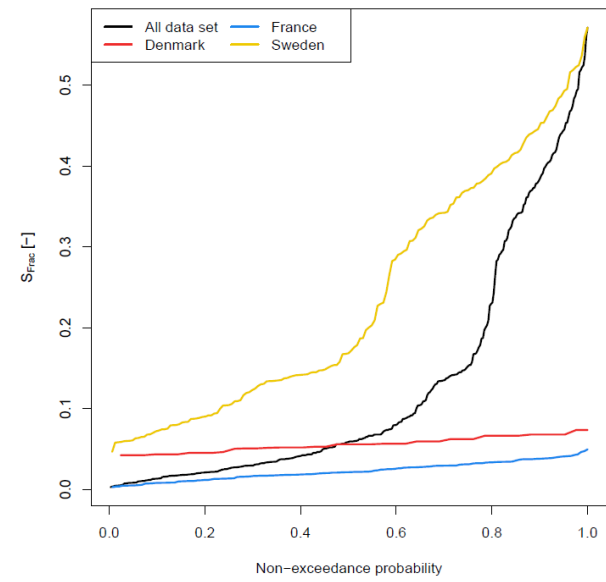

Supplement: Supplementary file 1 [file hess-2024-80-supplement.zip]
