# Supplementary material for: Lack of robustness of hydrological models: A large-sample diagnosis and an attempt to identify the hydrological and climatic drivers
Source: Copernicus journal article supplement (doi:10.5194/hess-2024-80), 2024-05-21

## Supplementary material 1: Geographical repartition of the climatic signatures used in the paper.

Each of the eight maps shows the repartition of a given climatic variable (in the title of the map). PMA: Mean annual precipitation, EMA: Mean annual evaporation, HUM: Humidity Index, PCV: Precipitation variability, Pint: Precipitation intensity index, DWoP: Days without precipitation ratio, Seaso: Seasonality index, SnFrac: Snow Fraction.

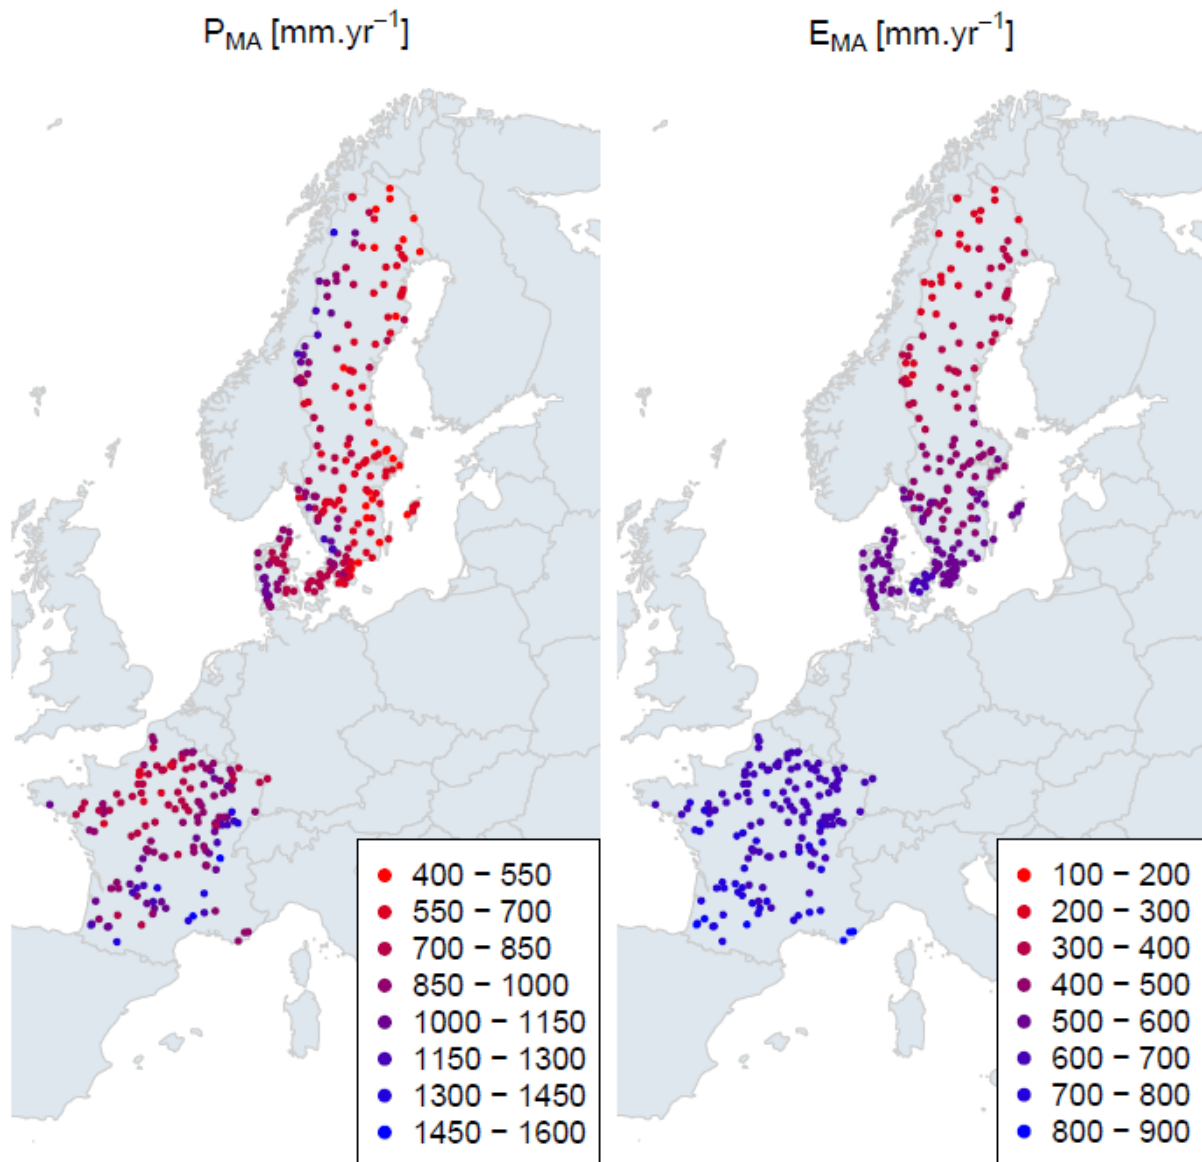

$I_{HUM} [-]$

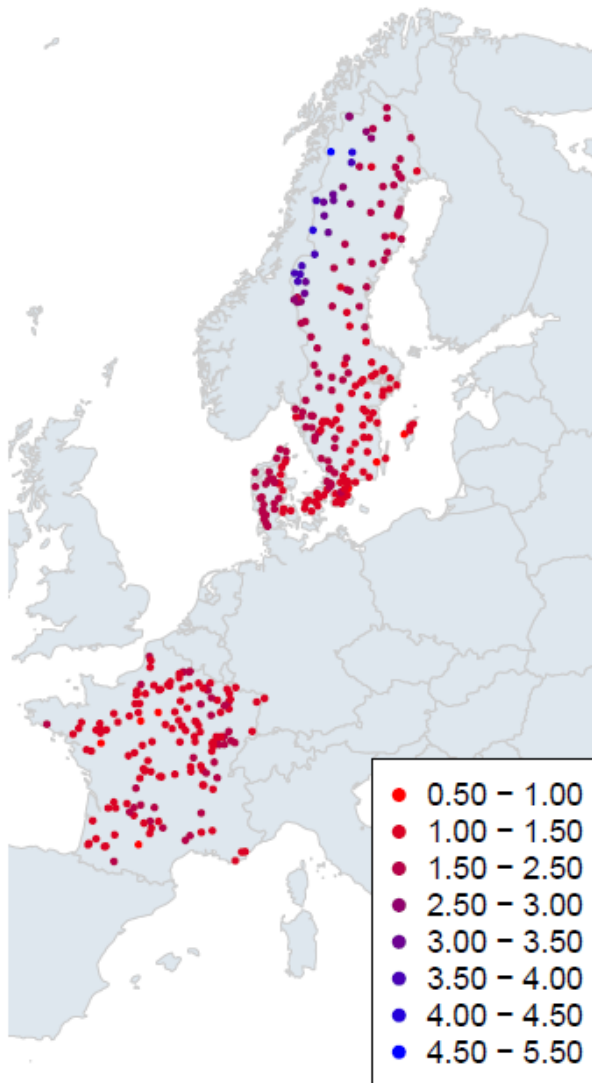

$P_{CV} [mm.d^{-1}]$

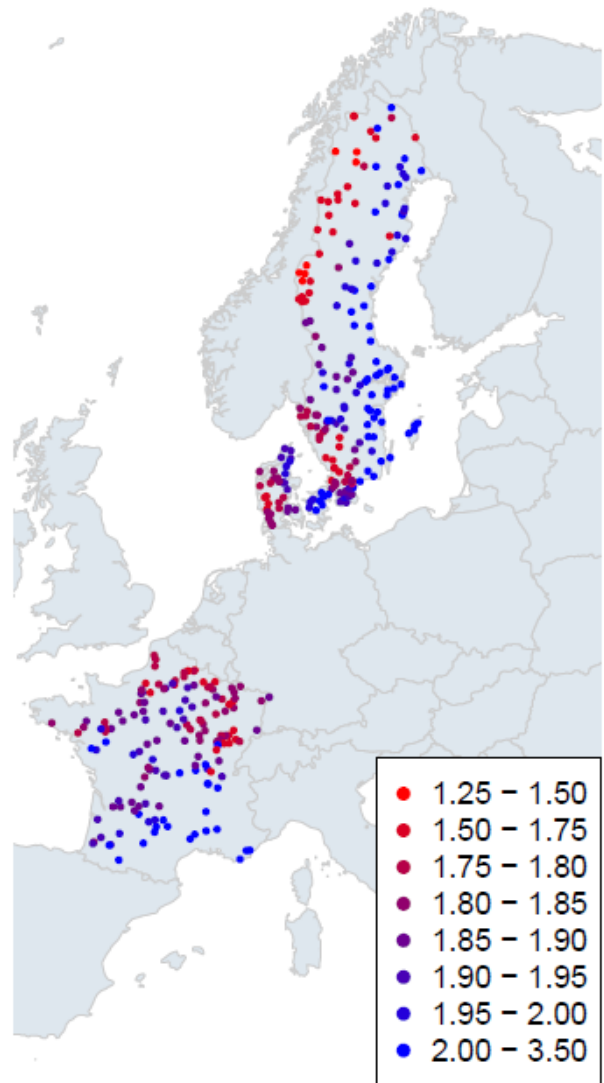

$P_{int} [-]$

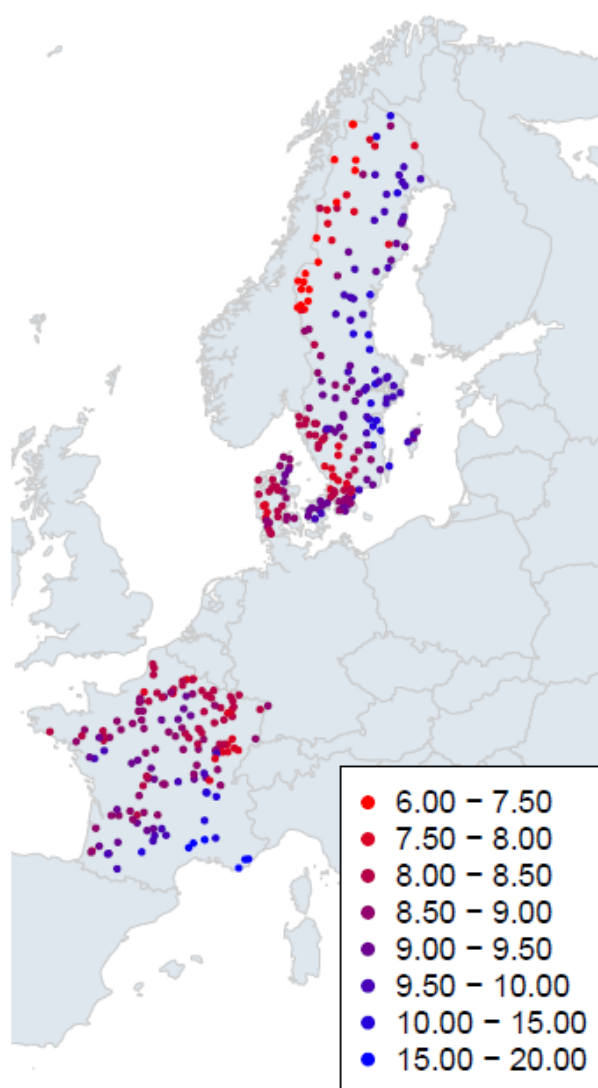

$D_{WoP} [-]$

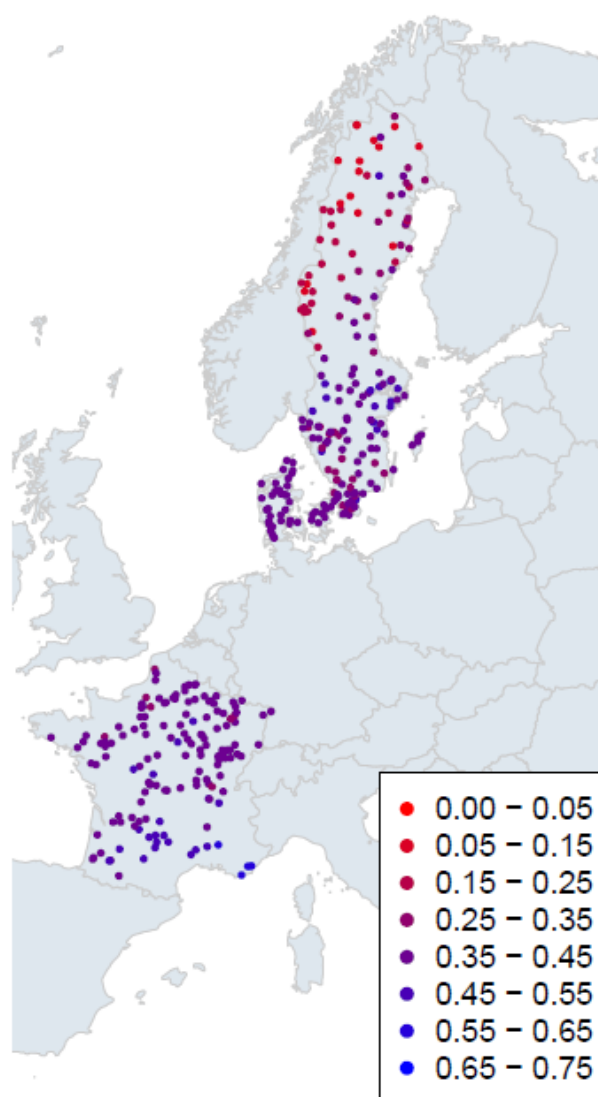

$I_{\text{Seaso}} [-]$

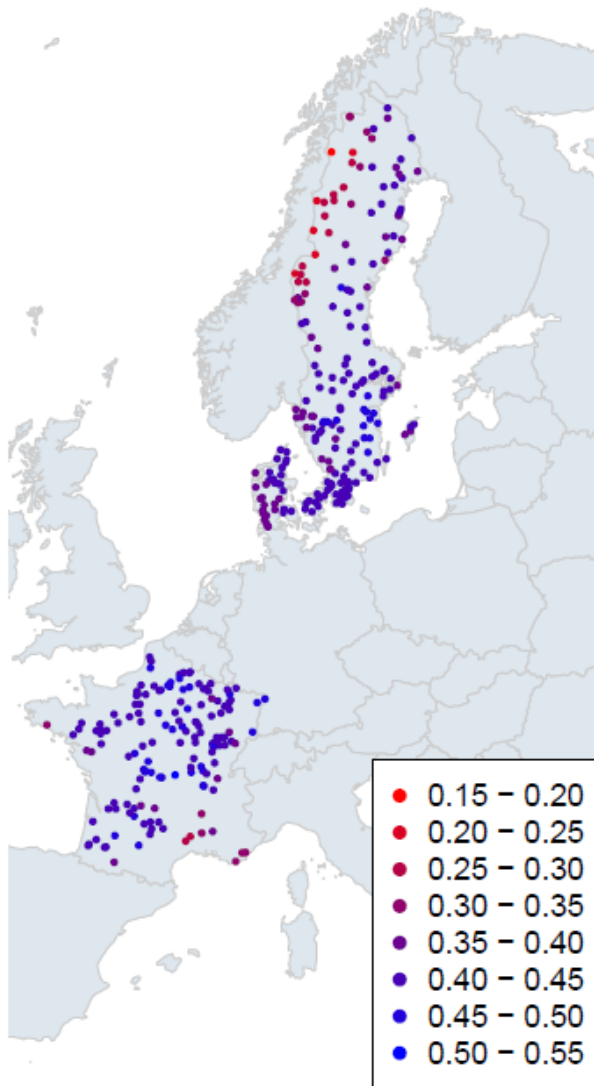

$S_{\text{Frac}} [-]$

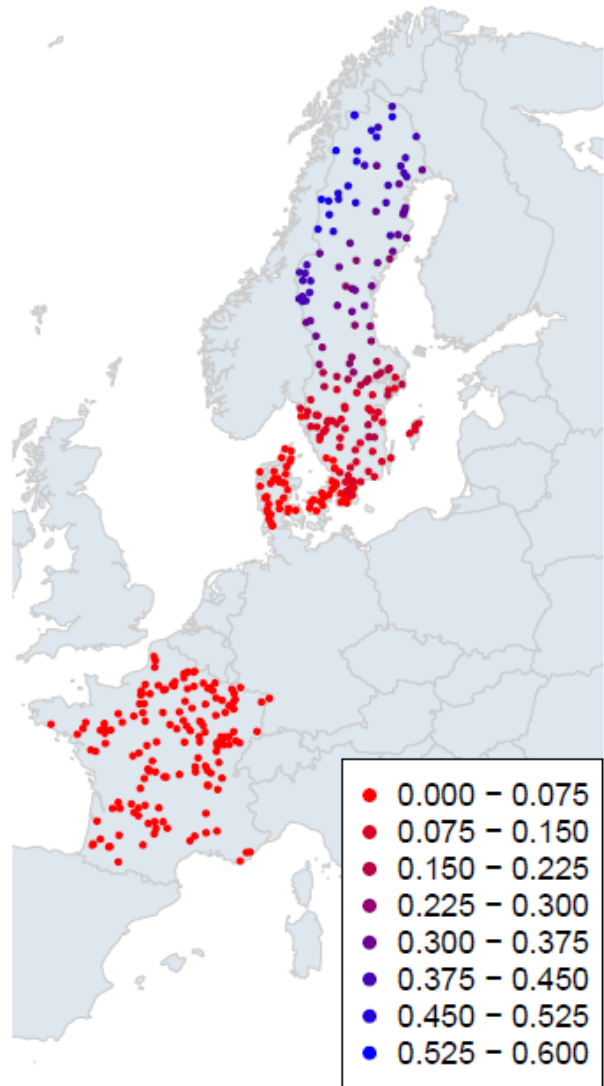

Supplement: Supplementary file 2 [file hess-2024-80-supplement.zip]
